# Supplementary material for: Relative Contribution of Fungal Communities to Carbon Loss and Humification Process in Algal Sludge Aerobic Composting
Source: MDPI journal article supplement (doi:10.3390/w16081084), 2024-04-10
Supplement: s1 [file s1]

**Table S1** The characteristics of the raw materials.

| Materials        | Moisture (%) | pH   | EC (μs/cm) |
|------------------|--------------|------|------------|
| Mushroom residue | 36.8         | 7.43 | 5140       |
| Mature compost   | 32.9         | 6.79 | 1944       |
| Algal slurry     | 74.6         | 8.59 | 1260       |

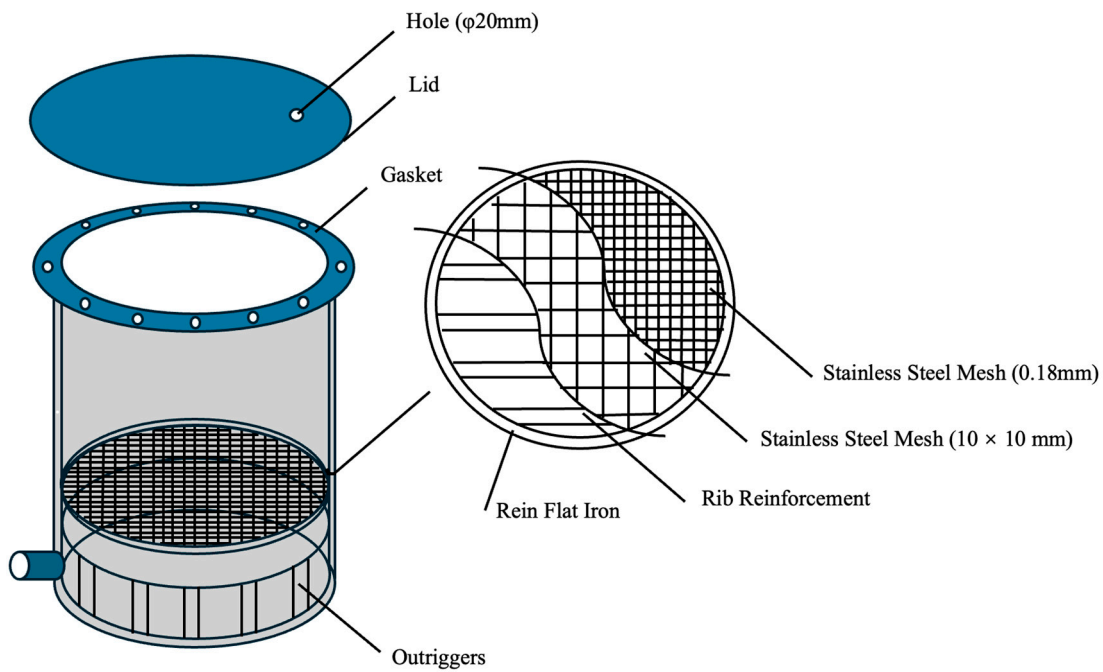

**Figure S1** Diagram of compost reactor.
